# Supplementary material for: Discovering Rare Genes Contributing to Cancer Stemness and Invasive Potential by GBM Single-Cell Transcriptional Analysis
Source: Cancers (Basel). 2019 Dec 16;11(12):2025. doi: 10.3390/cancers11122025 (PMC6966673; doi:10.3390/cancers11122025)
Supplement: Supplementary file 1 [file cancers-11-02025-s001.zip]

Archive with 6 entries (6 files):
- cancers-666237-Supplementary figures.docx
- cancers-666237-Supplementary figures.pdf
- Table S1. The basic information of scRNA-seq data of multiple cancer types.xlsx
- Table S2. Rare PCGs and rare lncRNAs identified in GBM cells..xlsx
- Table S3. Rare genes that specifically expressed in cancer stem cells of GBM.xlsx
- Table S4. Genes highly expressed in the 17-cell subset.xlsx
