# Supplementary material for: Discovering Rare Genes Contributing to Cancer Stemness and Invasive Potential by GBM Single-Cell Transcriptional Analysis
Source: Cancers (Basel). 2019 Dec 16;11(12):2025. doi: 10.3390/cancers11122025 (PMC6966673; doi:10.3390/cancers11122025)
Supplement: Supplementary file 1 [file cancers-11-02025-s001.zip › Table S1. The basic information of scRNA-seq data of multiple cancer types.xlsx]

## Sheet: Sheet1
Table S1. The basic information of scRNA-seq data of multiple cancer types
Cancer type	Breast	GBM	GBM2	Melanoma	CRC
Sample Num	11	4	4	3	11
Total cell number	515	352	3345	300	293
Malignant cell number	321	350	944	300	201
Total detected PCGs	18794	19672	19587	16638	18441
Total detected lncRNAs	9725	12623	11460	7162	8405
Rare PCGs	2072	1078	4261	1078	1033
Rare lncRNAs	2293	4563	2298	1747	1104
Sequence depth	5886173 (3101635~11104278)	3568419 (986359~6798418)	1757451 (294483~4402265)	1653754 (52951~3608472)
GSE ID	GSE75688	GSE57872	GSE84465	GSE81383	GSE81861
