# Supplementary material for: Discovering Rare Genes Contributing to Cancer Stemness and Invasive Potential by GBM Single-Cell Transcriptional Analysis
Source: Cancers (Basel). 2019 Dec 16;11(12):2025. doi: 10.3390/cancers11122025 (PMC6966673; doi:10.3390/cancers11122025)
Supplement: Supplementary file 1 [file cancers-11-02025-s001.zip › Table S2. Rare PCGs and rare lncRNAs identified in GBM cells..xlsx]

## Sheet: rareGene_All_thres_nonSpec
Table S2. Rare PCGs and rare lncRNAs identified in GBM cells.
rare PCGs		rare lncRNAs
Ensembl ID	Name	Ensembl ID	Name
ENSG00000268552	AL109927.1	ENSG00000238142	RP11-108M9.4
ENSG00000179902	C1orf194	ENSG00000237976	RP11-126K1.6
ENSG00000268154	AL591806.1	ENSG00000225265	RP11-378J18.3
ENSG00000188931	C1orf192	ENSG00000177788	RP5-1061H20.4
ENSG00000234237	AL162431.1	ENSG00000227157	AC068535.2
ENSG00000090104	RGS1	ENSG00000228528	AC068057.1
ENSG00000123689	G0S2	ENSG00000229243	AC098973.1
ENSG00000172023	REG1B	ENSG00000228028	AC069257.8
ENSG00000144230	GPR17	ENSG00000242686	RP11-1191J2.2
ENSG00000268846	AC018867.2	ENSG00000270751	RP11-461L13.2
ENSG00000127824	TUBA4A	ENSG00000248925	CTD-2083E4.6
ENSG00000186792	HYAL3	ENSG00000260192	RP11-756H20.1
ENSG00000137441	FGFBP2	ENSG00000228649	AC005682.5
ENSG00000169245	CXCL10	ENSG00000225792	AC004540.4
ENSG00000137434	C6orf52	ENSG00000223969	AC002456.2
ENSG00000187990	HIST1H2BG	ENSG00000237819	AC002454.1
ENSG00000168274	HIST1H2AE	ENSG00000247134	RP11-11N9.4
ENSG00000196966	HIST1H3E	ENSG00000254141	RP11-642D21.1
ENSG00000204444	APOM	ENSG00000273061	RP11-6J24.6
ENSG00000203877	RIPPLY2	ENSG00000236924	RP11-390F4.6
ENSG00000270617	URGCP-MRPS24	ENSG00000224945	RP11-82L18.2
ENSG00000272647	GS1-259H13.10	ENSG00000227540	RP11-152N13.5
ENSG00000267697	LUZP6	ENSG00000254427	RP11-430H10.1
ENSG00000268955	LRLE1	ENSG00000256940	RP11-783K16.5
ENSG00000236939	C8orf56	ENSG00000254682	RP11-660L16.2
ENSG00000215183	MSMP	ENSG00000254694	RP11-50B3.4
ENSG00000159899	NPR2	ENSG00000257303	RP11-977G19.11
ENSG00000155287	SLC25A28	ENSG00000258034	RP11-493P1.2
ENSG00000185187	SIGIRR	ENSG00000259018	RP11-124D2.3
ENSG00000184281	TSSC4	ENSG00000260260	RP11-304L19.5
ENSG00000166394	CYB5R2	ENSG00000262848	RP11-517A5.5
ENSG00000268403	AC132192.1	ENSG00000270049	RP11-297D21.4
ENSG00000168060	NAALADL1	ENSG00000260884	AC009120.5
ENSG00000146670	CDCA5	ENSG00000262165	RP11-81A22.5
ENSG00000135451	TROAP	ENSG00000263164	RP11-333E1.2
ENSG00000269120	AL133318.1	ENSG00000265205	AC010761.13
ENSG00000213145	CRIP1	ENSG00000267625	RP11-1094M14.14
ENSG00000137880	GCHFR	ENSG00000266402	SNORA76
ENSG00000237289	CKMT1B	ENSG00000267128	RNF157-AS1
ENSG00000183751	TBL3	ENSG00000266654	RP11-1376P16.1
ENSG00000159713	TPPP3	ENSG00000267277	CTD-2342J14.6
ENSG00000160606	TLCD1	ENSG00000269145	AC007192.6
ENSG00000167900	TK1	ENSG00000268081	RP11-678G14.2
ENSG00000152214	RIT2	ENSG00000225975	AC074138.3
ENSG00000171970	ZNF57	ENSG00000268352	AC007228.5
ENSG00000161281	COX7A1	ENSG00000225377	RP5-1103G7.4
ENSG00000188766	SPRED3	ENSG00000149656	LINC00266-1
ENSG00000101187	SLCO4A1
ENSG00000093009	CDC45
ENSG00000100162	CENPM
ENSG00000090889	KIF4A
