# Supplementary material for: Discovering Rare Genes Contributing to Cancer Stemness and Invasive Potential by GBM Single-Cell Transcriptional Analysis
Source: Cancers (Basel). 2019 Dec 16;11(12):2025. doi: 10.3390/cancers11122025 (PMC6966673; doi:10.3390/cancers11122025)
Supplement: Supplementary file 1 [file cancers-11-02025-s001.zip › Table S3. Rare genes that specifically expressed in cancer stem cells of GBM.xlsx]

## Sheet: MGH26
MGH26
stem cells	rare genes specific express in cancer stem cells
	rare lncRNAs	names of rare lncRNAs
MGH26_A01	ENSG00000228028	AC069257.8
MGH26_A03	ENSG00000223969	AC002456.2
MGH26_A06	ENSG00000266654	RP11-1376P16.1
MGH26_B02
MGH26_B03
MGH26_B10
MGH26_C05
MGH26_D03
MGH26_F05
MGH26_G12
MGH26_H02
MGH26_H12
MGH26-2_E10
MGH26-2_F01
MGH26-2_G10
MGH26-2_H02

## Sheet: MGH28
MGH28
stem cells	rare genes specific express in cancer stem cells
	rare PCGS	names of rare PCGs
MGH28_A03	ENSG00000101187	SLCO4A1
MGH28_A06	ENSG00000203877	RIPPLY2
MGH28_A07
MGH28_C04
MGH28_D09
MGH28_E01
MGH28_E06
MGH28_E10
MGH28_F05
MGH28_F08
MGH28_G10
MGH28_G11
MGH28_H03
MGH28_H11

## Sheet: MGH29
MGH29
stem cells	rare genes specific express in cancer stem cells
	rare lncRNAs	names of rare lncRNAs
MGH29_C01	ENSG00000228528	AC068057.1
MGH29_D05	ENSG00000224945	RP11-82L18.2

## Sheet: MGH30
MGH30
stem cells	rare genes specific express in cancer stem cells
	rare PCGS	names of rare PCGs
MGH30_A08	ENSG00000172023	REG1B
MGH30_D09
MGH30_F02
MGH30_G12
