# Supplementary material for: Discovering Rare Genes Contributing to Cancer Stemness and Invasive Potential by GBM Single-Cell Transcriptional Analysis
Source: Cancers (Basel). 2019 Dec 16;11(12):2025. doi: 10.3390/cancers11122025 (PMC6966673; doi:10.3390/cancers11122025)
Supplement: Supplementary file 1 [file cancers-11-02025-s001.zip › Table S4. Genes highly expressed in the 17-cell subset.xlsx]

## Sheet: CellSubset_genes
Ensembl_ID	Gene_Symbol	Z	cZ
ENSG00000007968	E2F2	-2.79716	-1.962
ENSG00000101773	RBBP8	-2.80042	-1.96486
ENSG00000119231	SENP5	-2.80917	-1.972
ENSG00000180855	ZNF443	-2.81929	-1.98227
ENSG00000134802	SLC43A3	-2.81987	-1.98282
ENSG00000156787	TBC1D31	-2.82875	-1.98984
ENSG00000063978	RNF4	-2.83295	-1.99381
ENSG00000053438	NNAT	-2.84944	-2.00925
ENSG00000205659	LIN52	-2.85425	-2.01377
ENSG00000150753	CCT5	-2.85874	-2.01879
ENSG00000171877	FRMD5	-2.86136	-2.02133
ENSG00000140365	COMMD4	-2.87413	-2.03403
ENSG00000178966	RMI1	-2.88007	-2.04047
ENSG00000145907	G3BP1	-2.88125	-2.04135
ENSG00000120948	TARDBP	-2.88843	-2.04733
ENSG00000160299	PCNT	-2.89719	-2.05544
ENSG00000129534	MIS18BP1	-2.91212	-2.07034
ENSG00000149554	CHEK1	-2.91283	-2.0708
ENSG00000196081	ZNF724	-2.91366	-2.07142
ENSG00000074266	EED	-2.92752	-2.08493
ENSG00000204209	DAXX	-2.92996	-2.0873
ENSG00000112029	FBXO5	-2.93964	-2.09609
ENSG00000130816	DNMT1	-2.93972	-2.09609
ENSG00000123374	CDK2	-2.94015	-2.09609
ENSG00000013810	TACC3	-2.94637	-2.10159
ENSG00000122483	CCDC18	-2.94677	-2.10159
ENSG00000108055	SMC3	-2.95155	-2.10694
ENSG00000108384	RAD51C	-2.9571	-2.11262
ENSG00000186767	SPIN4	-2.9593	-2.1147
ENSG00000180979	LRRC57	-2.9664	-2.12171
ENSG00000196646	ZNF136	-2.97673	-2.1327
ENSG00000111445	RFC5	-2.98786	-2.14155
ENSG00000127337	YEATS4	-2.99333	-2.14614
ENSG00000077684	JADE1	-3.02332	-2.1752
ENSG00000144395	CCDC150	-3.02698	-2.17798
ENSG00000181544	FANCB	-3.02791	-2.1787
ENSG00000141030	COPS3	-3.04324	-2.19494
ENSG00000148229	POLE3	-3.06127	-2.21079
ENSG00000143799	PARP1	-3.06701	-2.21654
ENSG00000125482	TTF1	-3.07186	-2.22097
ENSG00000137656	BUD13	-3.07424	-2.22249
ENSG00000146410	MTFR2	-3.07571	-2.22402
ENSG00000101868	POLA1	-3.07733	-2.22536
ENSG00000119397	CNTRL	-3.08137	-2.22907
ENSG00000118557	PMFBP1	-3.08527	-2.23311
ENSG00000020922	MRE11	-3.09374	-2.2405
ENSG00000179051	RCC2	-3.09785	-2.24404
ENSG00000058804	NDC1	-3.1092	-2.25564
ENSG00000181938	GINS3	-3.14047	-2.28621
ENSG00000198056	PRIM1	-3.14189	-2.28725
ENSG00000112992	NNT	-3.14893	-2.29396
ENSG00000163006	CCDC138	-3.1517	-2.29642
ENSG00000165916	PSMC3	-3.15476	-2.29938
ENSG00000184635	ZNF93	-3.15546	-2.30002
ENSG00000182628	SKA2	-3.16115	-2.30551
ENSG00000138758	SEPT11	-3.16729	-2.31103
ENSG00000113569	NUP155	-3.18182	-2.32549
ENSG00000172244	C5orf34	-3.19006	-2.33341
ENSG00000143924	EML4	-3.19037	-2.33341
ENSG00000132773	TOE1	-3.19078	-2.33353
ENSG00000136492	BRIP1	-3.20347	-2.3458
ENSG00000120802	TMPO	-3.21319	-2.3556
ENSG00000143815	LBR	-3.21351	-2.35573
ENSG00000162174	ASRGL1	-3.21854	-2.36168
ENSG00000109685	NSD2	-3.21984	-2.36251
ENSG00000125450	NUP85	-3.24918	-2.39253
ENSG00000176953	NFATC2IP	-3.25676	-2.39672
ENSG00000070950	RAD18	-3.25891	-2.39799
ENSG00000076242	MLH1	-3.27965	-2.41797
ENSG00000171793	CTPS1	-3.28533	-2.42245
ENSG00000140848	CPNE2	-3.29033	-2.42596
ENSG00000153044	CENPH	-3.30747	-2.44228
ENSG00000118298	CA14	-3.32893	-2.46256
ENSG00000144908	ALDH1L1	-3.33361	-2.46737
ENSG00000029993	HMGB3	-3.33998	-2.47374
ENSG00000168393	DTYMK	-3.3407	-2.4741
ENSG00000076003	MCM6	-3.34409	-2.47751
ENSG00000106399	RPA3	-3.34574	-2.47902
ENSG00000125944	HNRNPR	-3.34766	-2.48119
ENSG00000078668	VDAC3	-3.34919	-2.48215
ENSG00000172795	DCP2	-3.35407	-2.48667
ENSG00000149136	SSRP1	-3.3562	-2.48818
ENSG00000120437	ACAT2	-3.36472	-2.4951
ENSG00000196510	ANAPC7	-3.38624	-2.51557
ENSG00000154473	BUB3	-3.39064	-2.51901
ENSG00000167005	NUDT21	-3.39153	-2.51951
ENSG00000136861	CDK5RAP2	-3.3959	-2.52385
ENSG00000117748	RPA2	-3.40508	-2.53277
ENSG00000168411	RFWD3	-3.43045	-2.55661
ENSG00000160298	C21orf58	-3.43973	-2.56557
ENSG00000101361	NOP56	-3.44676	-2.57066
ENSG00000176208	ATAD5	-3.45207	-2.57446
ENSG00000066279	ASPM	-3.46122	-2.58151
ENSG00000173207	CKS1B	-3.46169	-2.58177
ENSG00000133026	MYH10	-3.46789	-2.58667
ENSG00000147140	NONO	-3.47714	-2.59618
ENSG00000136518	ACTL6A	-3.48521	-2.60291
ENSG00000185811	IKZF1	-3.49067	-2.60806
ENSG00000185869	ZNF829	-3.51068	-2.62842
ENSG00000142731	PLK4	-3.52033	-2.63797
ENSG00000051180	RAD51	-3.52476	-2.64118
ENSG00000186185	KIF18B	-3.53575	-2.65169
ENSG00000130695	CEP85	-3.53631	-2.65205
ENSG00000106144	CASP2	-3.5752	-2.6851
ENSG00000140382	HMG20A	-3.57668	-2.68625
ENSG00000204899	MZT1	-3.58825	-2.69619
ENSG00000112312	GMNN	-3.61886	-2.72465
ENSG00000187514	PTMA	-3.62045	-2.72553
ENSG00000103540	CCP110	-3.62935	-2.73265
ENSG00000154429	CCSAP	-3.65186	-2.75312
ENSG00000103995	CEP152	-3.66301	-2.76176
ENSG00000065328	MCM10	-3.66324	-2.76176
ENSG00000132341	RAN	-3.66735	-2.76608
ENSG00000122566	HNRNPA2B1	-3.67487	-2.77324
ENSG00000145604	SKP2	-3.67994	-2.77809
ENSG00000101945	SUV39H1	-3.68562	-2.78248
ENSG00000151287	TEX30	-3.69087	-2.78629
ENSG00000101639	CEP192	-3.69242	-2.78775
ENSG00000135476	ESPL1	-3.71174	-2.80538
ENSG00000183765	CHEK2	-3.73539	-2.82572
ENSG00000119906	SLF2	-3.73668	-2.82651
ENSG00000124795	DEK	-3.74921	-2.83638
ENSG00000170779	CDCA4	-3.7783	-2.85949
ENSG00000149929	HIRIP3	-3.77836	-2.85949
ENSG00000100714	MTHFD1	-3.79622	-2.87368
ENSG00000078246	TULP3	-3.80449	-2.88094
ENSG00000113456	RAD1	-3.82299	-2.89643
ENSG00000075218	GTSE1	-3.82867	-2.89981
ENSG00000092470	WDR76	-3.82872	-2.89981
ENSG00000106477	CEP41	-3.83321	-2.90267
ENSG00000185480	PARPBP	-3.83705	-2.90364
ENSG00000203760	CENPW	-3.85343	-2.91447
ENSG00000134873	CLDN10	-3.88591	-2.9386
ENSG00000085840	ORC1	-3.89408	-2.94233
ENSG00000100281	HMGXB4	-3.90745	-2.95214
ENSG00000173456	RNF26	-3.90874	-2.95254
ENSG00000187741	FANCA	-3.91335	-2.9555
ENSG00000109674	NEIL3	-3.91361	-2.9555
ENSG00000173421	CCDC36	-3.91592	-2.95551
ENSG00000166845	C18orf54	-3.95972	-2.98858
ENSG00000132199	ENOSF1	-3.96438	-2.99332
ENSG00000079246	XRCC5	-3.98959	-3.0144
ENSG00000138376	BARD1	-3.99961	-3.02342
ENSG00000175305	CCNE2	-4.00904	-3.03036
ENSG00000111581	NUP107	-4.00995	-3.03087
ENSG00000197275	RAD54B	-4.01466	-3.03412
ENSG00000092201	SUPT16H	-4.0222	-3.04001
ENSG00000175216	CKAP5	-4.03386	-3.04885
ENSG00000123136	DDX39A	-4.04141	-3.05657
ENSG00000143621	ILF2	-4.07039	-3.07311
ENSG00000162521	RBBP4	-4.07755	-3.0762
ENSG00000121211	MND1	-4.09959	-3.0902
ENSG00000102384	CENPI	-4.1082	-3.09565
ENSG00000106462	EZH2	-4.11385	-3.09919
ENSG00000132383	RPA1	-4.11651	-3.10024
ENSG00000116830	TTF2	-4.11847	-3.10196
ENSG00000134574	DDB2	-4.1205	-3.10296
ENSG00000120699	EXOSC8	-4.13042	-3.1141
ENSG00000138658	ZGRF1	-4.13126	-3.11425
ENSG00000137310	TCF19	-4.132	-3.11425
ENSG00000119403	PHF19	-4.1332	-3.11444
ENSG00000112118	MCM3	-4.14779	-3.12746
ENSG00000167720	SRR	-4.16258	-3.13986
ENSG00000077514	POLD3	-4.16339	-3.13986
ENSG00000095002	MSH2	-4.192	-3.16089
ENSG00000127483	HP1BP3	-4.19372	-3.16089
ENSG00000132780	NASP	-4.19886	-3.16558
ENSG00000138587	MNS1	-4.22002	-3.18461
ENSG00000049541	RFC2	-4.24503	-3.20648
ENSG00000180198	RCC1	-4.26085	-3.22393
ENSG00000024526	DEPDC1	-4.27783	-3.2375
ENSG00000175567	UCP2	-4.28146	-3.24072
ENSG00000040275	SPDL1	-4.29262	-3.2501
ENSG00000012048	BRCA1	-4.29485	-3.25196
ENSG00000115392	FANCL	-4.31438	-3.27196
ENSG00000106268	NUDT1	-4.33959	-3.294
ENSG00000174442	ZWILCH	-4.36842	-3.32033
ENSG00000152253	SPC25	-4.3699	-3.32115
ENSG00000198554	WDHD1	-4.37382	-3.32401
ENSG00000113810	SMC4	-4.38314	-3.33051
ENSG00000170852	KBTBD2	-4.39521	-3.34035
ENSG00000213551	DNAJC9	-4.39965	-3.3449
ENSG00000104738	MCM4	-4.40248	-3.34739
ENSG00000123975	CKS2	-4.47471	-3.42458
ENSG00000174371	EXO1	-4.48115	-3.43043
ENSG00000197299	BLM	-4.55849	-3.51459
ENSG00000051825	MPHOSPH9	-4.59955	-3.56113
ENSG00000162607	USP1	-4.60233	-3.5634
ENSG00000094916	CBX5	-4.62063	-3.58522
ENSG00000109881	CCDC34	-4.63903	-3.6059
ENSG00000142230	SAE1	-4.6498	-3.61583
ENSG00000184661	CDCA2	-4.71076	-3.69079
ENSG00000117650	NEK2	-4.71447	-3.69418
ENSG00000171792	RHNO1	-4.72437	-3.7053
ENSG00000138092	CENPO	-4.74935	-3.73519
ENSG00000147274	RBMX	-4.74944	-3.73519
ENSG00000123473	STIL	-4.75297	-3.73721
ENSG00000189057	FAM111B	-4.77749	-3.76143
ENSG00000138182	KIF20B	-4.78782	-3.773
ENSG00000006634	DBF4	-4.81539	-3.80594
ENSG00000143476	DTL	-4.81715	-3.80684
ENSG00000167325	RRM1	-4.86019	-3.85627
ENSG00000111206	FOXM1	-4.87313	-3.87096
ENSG00000165490	DDIAS	-4.87372	-3.87096
ENSG00000131351	HAUS8	-4.90935	-3.90785
ENSG00000138160	KIF11	-4.93452	-3.9362
ENSG00000100162	CENPM	-4.94374	-3.94622
ENSG00000213390	ARHGAP19	-4.94636	-3.94811
ENSG00000166881	NEMP1	-4.94667	-3.94811
ENSG00000068489	PRR11	-4.94894	-3.94862
ENSG00000072501	SMC1A	-4.96404	-3.96583
ENSG00000131153	GINS2	-4.98141	-3.98445
ENSG00000105968	H2AFV	-5.02033	-4.02808
ENSG00000187951	ARHGAP11B	-5.02147	-4.0281
ENSG00000175455	CCDC14	-5.03433	-4.04247
ENSG00000051341	POLQ	-5.06197	-4.07487
ENSG00000183856	IQGAP3	-5.07389	-4.08526
ENSG00000109084	TMEM97	-5.10313	-4.11812
ENSG00000071539	TRIP13	-5.10316	-4.11812
ENSG00000160352	ZNF714	-5.17395	-4.19999
ENSG00000134291	TMEM106C	-5.17805	-4.20355
ENSG00000131462	TUBG1	-5.18455	-4.21001
ENSG00000163535	SGO2	-5.18742	-4.21062
ENSG00000092853	CLSPN	-5.1998	-4.2242
ENSG00000112983	BRD8	-5.24376	-4.27593
ENSG00000100749	VRK1	-5.27735	-4.31214
ENSG00000165501	LRR1	-5.27789	-4.31214
ENSG00000113648	H2AFY	-5.31842	-4.35722
ENSG00000132646	PCNA	-5.32419	-4.36268
ENSG00000145386	CCNA2	-5.33016	-4.36598
ENSG00000184445	KNTC1	-5.33682	-4.3719
ENSG00000129484	PARP2	-5.35006	-4.3863
ENSG00000144554	FANCD2	-5.46431	-4.52014
ENSG00000010292	NCAPD2	-5.51523	-4.5793
ENSG00000131470	PSMC3IP	-5.55616	-4.62643
ENSG00000137404	NRM	-5.60497	-4.68128
ENSG00000011426	ANLN	-5.63047	-4.70994
ENSG00000154920	EME1	-5.69181	-4.77931
ENSG00000072571	HMMR	-5.72058	-4.81168
ENSG00000111247	RAD51AP1	-5.77203	-4.8706
ENSG00000163507	KIAA1524	-5.78093	-4.87851
ENSG00000069275	NUCKS1	-5.78803	-4.88483
ENSG00000139734	DIAPH3	-5.85621	-4.96159
ENSG00000136811	ODF2	-5.881	-4.98902
ENSG00000198826	ARHGAP11A	-5.9189	-5.03169
ENSG00000083720	OXCT1	-5.93897	-5.05352
ENSG00000085999	RAD54L	-5.9431	-5.05679
ENSG00000087586	AURKA	-5.94527	-5.05776
ENSG00000101003	GINS1	-5.94769	-5.05776
ENSG00000182010	RTKN2	-5.95389	-5.06306
ENSG00000119969	HELLS	-5.97393	-5.08478
ENSG00000121621	KIF18A	-6.01673	-5.13296
ENSG00000135451	TROAP	-6.0243	-5.14013
ENSG00000176890	TYMS	-6.13162	-5.26125
ENSG00000163918	RFC4	-6.13704	-5.2659
ENSG00000196584	XRCC2	-6.16241	-5.29358
ENSG00000179750	APOBEC3B	-6.17222	-5.30326
ENSG00000166803	PCLAF	-6.19459	-5.32742
ENSG00000171320	ESCO2	-6.25844	-5.39932
ENSG00000151503	NCAPD3	-6.35331	-5.50494
ENSG00000104889	RNASEH2A	-6.37445	-5.5275
ENSG00000167900	TK1	-6.42426	-5.58283
ENSG00000182481	KPNA2	-6.46204	-5.62431
ENSG00000132436	FIGNL1	-6.47052	-5.63232
ENSG00000124207	CSE1L	-6.51979	-5.68682
ENSG00000166451	CENPN	-6.55822	-5.72888
ENSG00000100526	CDKN3	-6.5594	-5.72888
ENSG00000196230	TUBB	-6.57446	-5.74397
ENSG00000133119	RFC3	-6.58467	-5.75386
ENSG00000164754	RAD21	-6.59242	-5.76094
ENSG00000094804	CDC6	-6.60901	-5.77805
ENSG00000183763	TRAIP	-6.61136	-5.77896
ENSG00000117399	CDC20	-6.62153	-5.78874
ENSG00000137563	GGH	-6.65826	-5.82868
ENSG00000123219	CENPK	-6.72811	-5.90609
ENSG00000165480	SKA3	-6.73785	-5.91377
ENSG00000149636	DSN1	-6.77273	-5.95116
ENSG00000138778	CENPE	-6.8003	-5.98049
ENSG00000170540	ARL6IP1	-6.80489	-5.98383
ENSG00000112742	TTK	-6.83075	-6.01118
ENSG00000143401	ANP32E	-6.84633	-6.02689
ENSG00000228716	DHFR	-6.88111	-6.06425
ENSG00000129810	SGO1	-7.00906	-6.20643
ENSG00000136824	SMC2	-7.01423	-6.20904
ENSG00000118193	KIF14	-7.06339	-6.26168
ENSG00000128944	KNSTRN	-7.09048	-6.29012
ENSG00000151725	CENPU	-7.13178	-6.33446
ENSG00000097046	CDC7	-7.13446	-6.33547
ENSG00000197061	HIST1H4C	-7.1506	-6.34951
ENSG00000139618	BRCA2	-7.15184	-6.34951
ENSG00000121152	NCAPH	-7.15633	-6.35177
ENSG00000122952	ZWINT	-7.1564	-6.35177
ENSG00000035499	DEPDC1B	-7.15732	-6.35177
ENSG00000105011	ASF1B	-7.15792	-6.35177
ENSG00000169679	BUB1	-7.15807	-6.35177
ENSG00000171241	SHCBP1	-7.15926	-6.35177
ENSG00000156802	ATAD2	-7.15941	-6.35177
ENSG00000123416	TUBA1B	-7.15941	-6.35177
ENSG00000143228	NUF2	-7.16005	-6.35177
ENSG00000111602	TIMELESS	-7.16013	-6.35177
ENSG00000164611	PTTG1	-7.16024	-6.35177
ENSG00000111665	CDCA3	-7.16047	-6.35177
ENSG00000136108	CKAP2	-7.16054	-6.35177
ENSG00000161888	SPC24	-7.16069	-6.35177
ENSG00000114346	ECT2	-7.16077	-6.35177
ENSG00000165304	MELK	-7.16077	-6.35177
ENSG00000080986	NDC80	-7.16077	-6.35177
ENSG00000154839	SKA1	-7.16077	-6.35177
ENSG00000175063	UBE2C	-7.16077	-6.35177
ENSG00000093009	CDC45	-7.16077	-6.35177
ENSG00000117632	STMN1	-7.16081	-6.35177
ENSG00000198830	HMGN2	-7.16081	-6.35177
ENSG00000077152	UBE2T	-7.16081	-6.35177
ENSG00000117724	CENPF	-7.16081	-6.35177
ENSG00000171848	RRM2	-7.16081	-6.35177
ENSG00000169607	CKAP2L	-7.16081	-6.35177
ENSG00000123485	HJURP	-7.16081	-6.35177
ENSG00000164087	POC1A	-7.16081	-6.35177
ENSG00000109805	NCAPG	-7.16081	-6.35177
ENSG00000164104	HMGB2	-7.16081	-6.35177
ENSG00000158402	CDC25C	-7.16081	-6.35177
ENSG00000166508	MCM7	-7.16081	-6.35177
ENSG00000146918	NCAPG2	-7.16081	-6.35177
ENSG00000170312	CDK1	-7.16081	-6.35177
ENSG00000148773	MKI67	-7.16081	-6.35177
ENSG00000168496	FEN1	-7.16081	-6.35177
ENSG00000146670	CDCA5	-7.16081	-6.35177
ENSG00000126787	DLGAP5	-7.16081	-6.35177
ENSG00000137812	KNL1	-7.16081	-6.35177
ENSG00000137804	NUSAP1	-7.16081	-6.35177
ENSG00000137807	KIF23	-7.16081	-6.35177
ENSG00000198901	PRC1	-7.16081	-6.35177
ENSG00000166851	PLK1	-7.16081	-6.35177
ENSG00000079616	KIF22	-7.16081	-6.35177
ENSG00000129195	PIMREG	-7.16081	-6.35177
ENSG00000178999	AURKB	-7.16081	-6.35177
ENSG00000090889	KIF4A	-7.16081	-6.35177
ENSG00000134690	CDCA8	-7.16085	-6.35177
ENSG00000142945	KIF2C	-7.16085	-6.35177
ENSG00000163808	KIF15	-7.16085	-6.35177
ENSG00000164032	H2AFZ	-7.16085	-6.35177
ENSG00000164109	MAD2L1	-7.16085	-6.35177
ENSG00000134057	CCNB1	-7.16085	-6.35177
ENSG00000112984	KIF20A	-7.16085	-6.35177
ENSG00000168078	PBK	-7.16085	-6.35177
ENSG00000166801	FAM111A	-7.16085	-6.35177
ENSG00000161800	RACGAP1	-7.16085	-6.35177
ENSG00000189403	HMGB1	-7.16085	-6.35177
ENSG00000156970	BUB1B	-7.16085	-6.35177
ENSG00000157456	CCNB2	-7.16085	-6.35177
ENSG00000140525	FANCI	-7.16085	-6.35177
ENSG00000076382	SPAG5	-7.16085	-6.35177
ENSG00000131747	TOP2A	-7.16085	-6.35177
ENSG00000089685	BIRC5	-7.16085	-6.35177
ENSG00000088325	TPX2	-7.16085	-6.35177
